# Supplementary material for: Reference-Guided De Novo Genome Assembly of the Flour Beetle Tribolium freemani
Source: MDPI journal article supplement (doi:10.3390/ijms23115869), 2022-05-24
Supplement: s1 [file s1]

**Table S6.** Abundance of DNA transposon subclasses in Tfree 1.0 and Tcas5.2 genome assemblies expressed as total number of specific element (graphical representation is given at the Figure 6C).

| <b>Class</b>   | <b>Subclass</b> | <b>Tfree1.0</b> | <b>Tcas5.2</b> | <b>Difference</b> |
|----------------|-----------------|-----------------|----------------|-------------------|
| DNA transposon | Academ-1        | 940             | 573            | 367               |
| DNA transposon | CMC-Chapaev-3   | 973             | 125            | 848               |
| DNA transposon | CMC-EnSpm       | 41              | 12             | 29                |
| DNA transposon | CMC-Transib     | 356             | 98             | 258               |
| DNA transposon | Crypton         | 421             | 221            | 200               |
| DNA transposon | Crypton-I       | 710             | 301            | 409               |
| DNA transposon | Crypton-V       | 6               | 7              | -1                |
| DNA transposon | Ginger-1        | 3               | 3              | 0                 |
| DNA transposon | Ginger-2        | 11              | 4              | 7                 |
| DNA transposon | IS3EU           | 9086            | 3074           | 6012              |
| DNA transposon | Kolobok-E       | 2469            | 901            | 1568              |
| DNA transposon | Kolobok-Hydra   | 52              | 142            | -90               |
| DNA transposon | Kolobok-T2      | 16              | 3              | 13                |
| DNA transposon | Kolobok-T2?     | 5               | 2              | 3                 |
| DNA transposon | MULE-MuDR       | 127             | 139            | -12               |
| DNA transposon | MULE-NOF        | 3286            | 1629           | 1657              |
| DNA transposon | Maverick        | 1956            | 1537           | 419               |
| DNA transposon | Merlin          | 11              | 7              | 4                 |
| DNA transposon | P               | 247             | 84             | 163               |
| DNA transposon | PIF-Harbinger   | 54              | 15             | 39                |
| DNA transposon | PIF-ISL2EU      | 36              | 2              | 34                |
| DNA transposon | PIF-Spy         | 29              | 16             | 13                |
| DNA transposon | PiggyBac        | 93              | 71             | 22                |
| DNA transposon | Sola-1          | 70              | 8              | 62                |
| DNA transposon | Sola-2          | 47              | 49             | -2                |
| DNA transposon | Sola-3          | 1               | 4              | -3                |
| DNA transposon | TcMar           | 47              | 40             | 7                 |
| DNA transposon | TcMar-Fot1      | 64              | 17             | 47                |
| DNA transposon | TcMar-Mariner   | 602             | 325            | 277               |
| DNA transposon | TcMar-Pogo      | 33              | 81             | -48               |
| DNA transposon | TcMar-Tc1       | 14387           | 10970          | 3417              |
| DNA transposon | TcMar-Tc1?      | 574             | 608            | -34               |
| DNA transposon | TcMar-Tc4       | 61              | 20             | 41                |
| DNA transposon | TcMar-Tigger    | 227             | 918            | -691              |
| DNA transposon | TcMar-m44       | 215             | 49             | 166               |
| DNA transposon | TcMar?          | 3               | 2              | 1                 |
| DNA transposon | Zator           | 4               | 2              | 2                 |
| DNA transposon | hAT             | 7               | 3              | 4                 |
| DNA transposon | hAT-Ac          | 531             | 79             | 452               |
| DNA transposon | hAT-Blackjack   | 97              | 71             | 26                |
| DNA transposon | hAT-Charlie     | 123             | 55             | 68                |
| DNA transposon | hAT-Pegasus     | 6               | 3              | 3                 |
| DNA transposon | hAT-Tag1        | 148             | 1              | 147               |
| DNA transposon | hAT-Tip100      | 759             | 198            | 561               |
| DNA transposon | hAT-hAT19       | 111             | 47             | 64                |
| DNA transposon | hAT-hAT19?      | 1               | 1              | 0                 |
| DNA transposon | hAT-hATm        | 25              | 24             | 1                 |
| DNA transposon | hAT-hobo        | 33              | 18             | 15                |
