# Supplementary material for: Reference-Guided De Novo Genome Assembly of the Flour Beetle Tribolium freemani
Source: MDPI journal article supplement (doi:10.3390/ijms23115869), 2022-05-24
Supplement: s1 [file s1]

**Table S8.** Annotations of the *T. freemani* mitogenome and its comparison to the *T. castaneum* mitogenome (NC\_003081.2). Alignment scores between *T. freemani* and *T. castaneum* mitochondrial genes were calculated using Needleman–Wunsch algorithm.

| Gene           | Start position | End position | Size (bp) | Start codon | Termination | Similarity to <i>T. castaneum</i> mtDNA |                  |
|----------------|----------------|--------------|-----------|-------------|-------------|-----------------------------------------|------------------|
|                |                |              |           |             |             | Alignment score                         | Similarity score |
| tRNA-Ile       | 1              | 63           | 63        |             |             | 116,9696                                | 0,984127         |
| tRNA-Gln       | 61             | 129          | 69        |             |             | 97,33598                                | 0,9275362        |
| tRNA-Met       | 129            | 196          | 68        |             |             | 87,0156                                 | 0,9411765        |
| ND2            | 203            | 1207         | 1005      | ATA         | TAA         | 257,5144                                | 0,7870647        |
| tRNA-Trp       | 1206           | 1272         | 67        |             |             | 124,8967                                | 0,9850746        |
| tRNA-Cys       | 1272           | 1332         | 61        |             |             | 89,36294                                | 0,9344262        |
| tRNA-Tyr       | 1334           | 1397         | 64        |             |             | 1,497805                                | 0,765625         |
| COX1           | 1394           | 2935         | 1542      | CAC         | TAA         | 1163,827                                | 0,8463035        |
| tRNA-Leu       | 2937           | 3002         | 66        |             |             | 74,40892                                | 0,9090909        |
| COX2           | 3003           | 3687         | 685       | ATA         | T           | 544,5334                                | 0,8510949        |
| tRNA-Lys       | 3691           | 3761         | 71        |             |             | 132,8237                                | 0,9859155        |
| tRNA-Asp       | 3789           | 3855         | 67        |             |             | 29,10444                                | 0,8358209        |
| ATP8           | 3856           | 4014         | 159       | ATC         | TAG         | -19,56359                               | 0,754717         |
| ATP6           | 4008           | 4679         | 672       | ATG         | TAA         | 338,7267                                | 0,8184524        |
| COX3           | 4679           | 5464         | 786       | ATG         | TAA         | 399,1438                                | 0,8155216        |
| tRNA-Gly       | 5467           | 5529         | 63        |             |             | 84,22575                                | 0,9365079        |
| ND3            | 5590           | 5883         | 294       | ATC         | TAG         | -269,9518                               | 0,5884354        |
| tRNA-Ala       | 5882           | 5948         | 67        |             |             | 77,61037                                | 0,8955224        |
| tRNA-Arg       | 5948           | 6010         | 63        |             |             | 84,98782                                | 0,952381         |
| tRNA-Asn       | 6010           | 6074         | 65        |             |             | 79,08857                                | 0,9384615        |
| tRNA-Ser       | 6075           | 6133         | 59        |             |             | 69,63734                                | 0,8983051        |
| tRNA-Glu       | 6134           | 6198         | 65        |             |             | 64,5461                                 | 0,8923077        |
| tRNA-Phe       | 6197           | 6261         | 65        |             |             | -184,3245                               | 0,4461538        |
| ND5            | 6263           | 7976         | 1714      | ATA         | T           | 1040,293                                | 0,827888         |
| tRNA-His       | 7974           | 8039         | 66        |             |             | 19,24164                                | 0,8030303        |
| ND4            | 8040           | 9372         | 1333      | ATG         | T           | 781,7487                                | 0,8237059        |
| ND4L           | 9366           | 9653         | 288       | ATG         | TAA         | 200,336                                 | 0,8368056        |
| tRNA-Thr       | 9656           | 9719         | 64        |             |             | 86,2075                                 | 0,9375           |
| tRNA-Pro       | 9720           | 9784         | 65        |             |             | 2,838774                                | 0,8153846        |
| ND6            | 9790           | 10281        | 492       | ATT         | TAA         | 35,82355                                | 0,7662602        |
| CYTB           | 10281          | 11420        | 1140      | ATG         | TAA         | 595,9787                                | 0,8192982        |
| tRNA-Ser2      | 11419          | 11485        | 67        |             |             | 61,39066                                | 0,8955224        |
| ND1            | 11503          | 12456        | 954       | ATA         | TAG         | 700,5536                                | 0,8427673        |
| tRNA-Leu2      | 12454          | 12518        | 65        |             |             | 64,54611                                | 0,8923077        |
| I-rRNA         | 12518          | 13762        | 1245      |             |             | 654,1954                                | 0,8168675        |
| tRNA-Val       | 13804          | 13872        | 69        |             |             | 113,0981                                | 0,9565217        |
| s-rRNA         | 13874          | 14648        | 775       |             |             | 702,1122                                | 0,8696774        |
| Control region | 14649          | 15757        | 1109      |             |             | -763,1833                               | 0,6723827        |
