# Supplementary material for: Reference-Guided De Novo Genome Assembly of the Flour Beetle Tribolium freemani
Source: MDPI journal article supplement (doi:10.3390/ijms23115869), 2022-05-24
Supplement: s1 [file s1]

**Table S5.** Distribution of repeat elements in *T. freemani* Tfree1.0 and *T. castaneum* Tcas5.2 genome assemblies. Linkage groups and unplaced contigs are taken into account for both species.

| Repeat family  | Tfree1.0           |             |                       | Tcas5.2            |             |                       |
|----------------|--------------------|-------------|-----------------------|--------------------|-------------|-----------------------|
|                | Number of elements | Length (bp) | Genome proportion (%) | Number of elements | Length (bp) | Genome proportion (%) |
| DNA            | 57,279             | 14,051,034  | 5.22                  | 33,970             | 8,279,569   | 4.99                  |
| LINE           | 8,897              | 2,926,173   | 1.09                  | 4,684              | 1,572,720   | 0.95                  |
| LTR            | 5,563              | 1,827,084   | 0.68                  | 2,593              | 766,028     | 0.46                  |
| Low_complexity | 67,068             | 2,834,397   | 1.05                  | 10,168             | 487,704     | 0.29                  |
| Rolling circle | 3,692              | 1,345,124   | 0.50                  | 1,997              | 258,101     | 0.16                  |
| SINE           | 839                | 149,600     | 0.06                  | 190                | 24,455      | 0.01                  |
| Simple_repeat  | 138,612            | 6,537,487   | 2.43                  | 36,673             | 1,662,985   | 1.00                  |
| rRNA           | 468                | 168,909     | 0.06                  | 346                | 50,383      | 0.03                  |
| tRNA           | 29                 | 2,203       | 0.001                 | 26                 | 1,978       | 0.001                 |
| <b>Total</b>   | 282,447            | 29,842,011  | 11.09                 | 90647              | 13103923    | 7.90                  |
