# Supplementary material for: Reference-Guided De Novo Genome Assembly of the Flour Beetle Tribolium freemani
Source: MDPI journal article supplement (doi:10.3390/ijms23115869), 2022-05-24
Supplement: s1 [file s1]

**Table S2.** Statistics of contig orientation into chromosome level scaffolds using RagTag algorithm.

|                           | <b>No. of contigs</b> | <b>Total length (bp)</b> |
|---------------------------|-----------------------|--------------------------|
| <b>Placed sequences</b>   | 99                    | 261,849,599              |
| <b>Unplaced sequences</b> | 11                    | 7,168,944                |
| <b>Total</b>              | 110                   | 269,018,543              |
