# Supplementary material for: Reference-Guided De Novo Genome Assembly of the Flour Beetle Tribolium freemani
Source: MDPI journal article supplement (doi:10.3390/ijms23115869), 2022-05-24
Supplement: s1 [file s1]

**Table S1.** Distribution of the major satellite DNA TFREE monomers and uniquely mappable features (UMFs) within the 679 contigs obtained with hifiasm assembler.

| Hifiasm contig | Contig length (bp) | Contig status in Tfree1.0 assembly | Number of uniquely mappable features (UMFs) within the contig | Number of TFREE satellite DNA monomers within the contig | Percentage of contig length occupied by TFREE satellite DNA (%) |
|----------------|--------------------|------------------------------------|---------------------------------------------------------------|----------------------------------------------------------|-----------------------------------------------------------------|
| ptg000016l     | 23376958           | In assembly                        | 38044                                                         | 27927                                                    | 0,20                                                            |
| ptg000002l     | 20865910           | In assembly                        | 27702                                                         | 27228                                                    | 0,21                                                            |
| ptg000003l     | 20620739           | In assembly                        | 25327                                                         | 24036                                                    | 0,19                                                            |
| ptg000012l     | 16082494           | In assembly                        | 28309                                                         | 1086                                                     | 0,01                                                            |
| ptg000020l     | 12447313           | In assembly                        | 830                                                           | 45472                                                    | 0,60                                                            |
| ptg000008l     | 12424795           | In assembly                        | 20937                                                         | 321                                                      | 0,00                                                            |
| ptg000041l     | 10608858           | In assembly                        | 18431                                                         | 197                                                      | 0,00                                                            |
| ptg000030l     | 9178789            | In assembly                        | 46                                                            | 37621                                                    | 0,67                                                            |
| ptg000004l     | 8542712            | In assembly                        | 4245                                                          | 16666                                                    | 0,32                                                            |
| ptg000060l     | 8487211            | In assembly                        | 18109                                                         | 50                                                       | 0,00                                                            |
| ptg000071l     | 8209875            | In assembly                        | 14728                                                         | 211                                                      | 0,00                                                            |
| ptg000048l     | 7974590            | In assembly                        | 12880                                                         | 42                                                       | 0,00                                                            |
| ptg000006l     | 7917093            | In assembly                        | 7471                                                          | 634                                                      | 0,01                                                            |
| ptg000069l     | 7541998            | In assembly                        | 13579                                                         | 175                                                      | 0,00                                                            |
| ptg000061l     | 6519519            | In assembly                        | 4513                                                          | 127                                                      | 0,00                                                            |
| ptg000005l     | 6399338            | In assembly                        | 24398                                                         | 156                                                      | 0,00                                                            |
| ptg000319l     | 6193494            | In assembly                        | 8517                                                          | 304                                                      | 0,01                                                            |
| ptg000031l     | 5522289            | In assembly                        | 7757                                                          | 143                                                      | 0,00                                                            |
| ptg000055l     | 4641919            | In assembly                        | 2275                                                          | 345                                                      | 0,01                                                            |
| ptg000117l     | 4462153            | In assembly                        | 3855                                                          | 4155                                                     | 0,15                                                            |
| ptg000021l     | 4264982            | In assembly                        | 5545                                                          | 35                                                       | 0,00                                                            |
| ptg000045l     | 4120959            | In assembly                        | 298                                                           | 8410                                                     | 0,33                                                            |
| ptg000019l     | 4119783            | In assembly                        | 4936                                                          | 4                                                        | 0,00                                                            |
| ptg000009l     | 4069966            | In assembly                        | 12                                                            | 14664                                                    | 0,59                                                            |
| ptg000022l     | 3887479            | In assembly                        | 1938                                                          | 44                                                       | 0,00                                                            |
| ptg000039l     | 3321203            | In assembly                        | 4663                                                          | 355                                                      | 0,01                                                            |
| ptg000166l     | 2960622            | In assembly                        | 2153                                                          | 208                                                      | 0,01                                                            |
| ptg000052l     | 2165914            | In assembly                        | 337                                                           | 1235                                                     | 0,06                                                            |
| ptg000082l     | 2080578            | In assembly                        | 804                                                           | 80                                                       | 0,00                                                            |
| ptg000173l     | 1794767            | In assembly                        | 1293                                                          | 107                                                      | 0,01                                                            |
| ptg000102l     | 1720055            | In assembly                        | 262                                                           | 1652                                                     | 0,15                                                            |
| ptg000144l     | 1678416            | In assembly                        | 1015                                                          | 75                                                       | 0,01                                                            |
| ptg000107l     | 1561342            | In assembly                        | 386                                                           | 95                                                       | 0,01                                                            |
| ptg000046l     | 1531797            | In assembly                        | 816                                                           | 3                                                        | 0,00                                                            |
| ptg000150l     | 1241913            | In assembly                        | 240                                                           | 67                                                       | 0,01                                                            |
| ptg000103l     | 1183169            | In assembly                        | 134                                                           | 242                                                      | 0,02                                                            |
| ptg000095l     | 1153942            | In assembly                        | 109                                                           | 204                                                      | 0,02                                                            |
| ptg000036l     | 1042122            | In assembly                        | 1310                                                          | 113                                                      | 0,02                                                            |
| ptg000342l     | 1041323            | In assembly                        | 867                                                           | 1818                                                     | 0,29                                                            |
| ptg000010l     | 941320             | In assembly                        | 1631                                                          | 37                                                       | 0,01                                                            |
| ptg000179l     | 762607             | In assembly                        | 74                                                            | 332                                                      | 0,05                                                            |
| ptg000243l     | 743376             | In assembly                        | 20                                                            | 1791                                                     | 0,40                                                            |
| ptg000112l     | 709056             | In assembly                        | 231                                                           | 7                                                        | 0,00                                                            |

|            |        |             |      |      |      |
|------------|--------|-------------|------|------|------|
| ptg000311l | 684097 | In assembly | 225  | 2    | 0,00 |
| ptg000140l | 660759 | In assembly | 464  | 0    | 0,00 |
| ptg000105l | 618581 | In assembly | 352  | 62   | 0,02 |
| ptg000251l | 600520 | In assembly | 295  | 4    | 0,00 |
| ptg000215l | 564234 | In assembly | 1423 | 8    | 0,00 |
| ptg000194l | 539326 | In assembly | 76   | 38   | 0,01 |
| ptg000228l | 533472 | In assembly | 91   | 0    | 0,00 |
| ptg000264l | 508407 | In assembly | 416  | 3    | 0,00 |
| ptg000101l | 460667 | In assembly | 22   | 1347 | 0,49 |
| ptg000196l | 422899 | In assembly | 313  | 0    | 0,00 |
| ptg000148l | 410420 | In assembly | 276  | 0    | 0,00 |
| ptg000111l | 382289 | In assembly | 4040 | 0    | 0,00 |
| ptg000198l | 318746 | In assembly | 259  | 6    | 0,01 |
| ptg000321l | 286311 | In assembly | 51   | 0    | 0,00 |
| ptg000099l | 275551 | In assembly | 61   | 0    | 0,00 |
| ptg000200l | 265695 | In assembly | 85   | 5    | 0,00 |
| ptg000306l | 255908 | In assembly | 25   | 5    | 0,00 |
| ptg000225l | 245249 | In assembly | 53   | 0    | 0,00 |
| ptg000245l | 228335 | In assembly | 62   | 175  | 0,12 |
| ptg000162l | 226747 | In assembly | 422  | 0    | 0,00 |
| ptg000368l | 214582 | In assembly | 104  | 0    | 0,00 |
| ptg000081l | 204053 | In assembly | 100  | 2    | 0,00 |
| ptg000057l | 196613 | In assembly | 272  | 0    | 0,00 |
| ptg000378l | 176107 | In assembly | 12   | 80   | 0,07 |
| ptg000330l | 176036 | In assembly | 287  | 0    | 0,00 |
| ptg000303l | 175816 | In assembly | 74   | 0    | 0,00 |
| ptg000384l | 173970 | In assembly | 23   | 3    | 0,00 |
| ptg000341l | 169908 | In assembly | 13   | 0    | 0,00 |
| ptg000426l | 167095 | In assembly | 26   | 0    | 0,00 |
| ptg000293l | 163589 | In assembly | 43   | 0    | 0,00 |
| ptg000525l | 162264 | In assembly | 169  | 0    | 0,00 |
| ptg000413l | 158778 | In assembly | 249  | 0    | 0,00 |
| ptg000419l | 148526 | In assembly | 390  | 0    | 0,00 |
| ptg000372l | 147764 | In assembly | 65   | 174  | 0,19 |
| ptg000359l | 139321 | In assembly | 36   | 8    | 0,01 |
| ptg000461l | 130433 | In assembly | 32   | 0    | 0,00 |
| ptg000236l | 127976 | In assembly | 30   | 0    | 0,00 |
| ptg000397l | 126202 | In assembly | 61   | 0    | 0,00 |
| ptg000253l | 124306 | In assembly | 123  | 0    | 0,00 |
| ptg000444l | 121480 | In assembly | 29   | 0    | 0,00 |
| ptg000463l | 116516 | In assembly | 63   | 0    | 0,00 |
| ptg000302l | 115069 | In assembly | 69   | 0    | 0,00 |
| ptg000202l | 109599 | In assembly | 131  | 29   | 0,04 |
| ptg000399l | 108752 | In assembly | 26   | 4    | 0,01 |
| ptg000246l | 107246 | In assembly | 38   | 0    | 0,00 |
| ptg000353l | 106235 | In assembly | 71   | 0    | 0,00 |
| ptg000326l | 97220  | In assembly | 363  | 0    | 0,00 |
| ptg000266l | 96573  | In assembly | 48   | 9    | 0,02 |
| ptg000329l | 82499  | In assembly | 104  | 0    | 0,00 |

|            |          |                 |    |       |      |
|------------|----------|-----------------|----|-------|------|
| ptg000420l | 77294    | In assembly     | 31 | 0     | 0,00 |
| ptg000249l | 75271    | In assembly     | 12 | 0     | 0,00 |
| ptg000503l | 75193    | In assembly     | 25 | 0     | 0,00 |
| ptg000282l | 71981    | In assembly     | 16 | 0     | 0,00 |
| ptg000083l | 69240    | In assembly     | 17 | 0     | 0,00 |
| ptg000232l | 61143    | In assembly     | 79 | 9     | 0,05 |
| ptg000531l | 52587    | In assembly     | 25 | 0     | 0,00 |
| ptg000424l | 52008    | In assembly     | 16 | 0     | 0,00 |
| ptg000570l | 51150    | In assembly     | 25 | 0     | 0,00 |
| ptg000328l | 49805    | In assembly     | 12 | 0     | 0,00 |
| ptg000389l | 49519    | In assembly     | 26 | 0     | 0,00 |
| ptg000437l | 49136    | In assembly     | 47 | 0     | 0,00 |
| ptg000556l | 43264    | In assembly     | 29 | 0     | 0,00 |
| ptg000396l | 41312    | In assembly     | 17 | 0     | 0,00 |
| ptg000406l | 38852    | In assembly     | 37 | 0     | 0,00 |
| ptg000429l | 33086    | In assembly     | 72 | 0     | 0,00 |
| ptg000614l | 24667    | In assembly     | 23 | 0     | 0,00 |
| ptg000500l | 22590    | In assembly     | 12 | 0     | 0,00 |
| ptg000025l | 10395870 | Not in assembly | 1  | 44591 | 0,70 |
| ptg000051l | 8081480  | Not in assembly | 1  | 36076 | 0,73 |
| ptg000100l | 6572231  | Not in assembly | 4  | 29483 | 0,74 |
| ptg000049l | 5886805  | Not in assembly | 10 | 25873 | 0,72 |
| ptg000073l | 5856792  | Not in assembly | 9  | 24005 | 0,68 |
| ptg000011l | 5262259  | Not in assembly | 0  | 24009 | 0,75 |
| ptg000054l | 5180355  | Not in assembly | 0  | 24024 | 0,76 |
| ptg000067l | 5091932  | Not in assembly | 0  | 20355 | 0,66 |
| ptg000040l | 4406435  | Not in assembly | 7  | 20722 | 0,77 |
| ptg000007l | 3908132  | Not in assembly | 3  | 17267 | 0,73 |
| ptg000068l | 3843893  | Not in assembly | 6  | 16458 | 0,70 |
| ptg000130l | 3621343  | Not in assembly | 0  | 16007 | 0,73 |
| ptg000074l | 3589998  | Not in assembly | 0  | 15804 | 0,72 |
| ptg000087l | 3163889  | Not in assembly | 0  | 15113 | 0,79 |
| ptg000089l | 3106993  | Not in assembly | 0  | 13732 | 0,73 |
| ptg000066l | 2904791  | Not in assembly | 5  | 13614 | 0,77 |
| ptg000014l | 2559024  | Not in assembly | 7  | 11679 | 0,75 |
| ptg000064l | 2283672  | Not in assembly | 0  | 11089 | 0,80 |
| ptg000108l | 2186041  | Not in assembly | 0  | 10690 | 0,80 |
| ptg000092l | 1956628  | Not in assembly | 0  | 8608  | 0,72 |
| ptg000113l | 1922342  | Not in assembly | 5  | 8646  | 0,74 |
| ptg000193l | 1922308  | Not in assembly | 2  | 2729  | 0,23 |
| ptg000151l | 1860087  | Not in assembly | 0  | 8599  | 0,76 |
| ptg000034l | 1845314  | Not in assembly | 0  | 7471  | 0,66 |
| ptg000050l | 1718546  | Not in assembly | 0  | 0     | 0,00 |
| ptg000032l | 1690284  | Not in assembly | 0  | 7573  | 0,74 |
| ptg000075l | 1676547  | Not in assembly | 0  | 7811  | 0,77 |
| ptg000120l | 1566981  | Not in assembly | 0  | 7377  | 0,77 |
| ptg000024l | 1430088  | Not in assembly | 0  | 6217  | 0,71 |
| ptg000136l | 1424603  | Not in assembly | 0  | 6357  | 0,73 |
| ptg000106l | 1313966  | Not in assembly | 0  | 5934  | 0,74 |

|            |         |                 |   |      |      |
|------------|---------|-----------------|---|------|------|
| ptg000085l | 1297837 | Not in assembly | 0 | 6104 | 0,77 |
| ptg000062l | 1288813 | Not in assembly | 0 | 6146 | 0,78 |
| ptg000176l | 1281092 | Not in assembly | 0 | 5471 | 0,70 |
| ptg000211l | 1264531 | Not in assembly | 0 | 5852 | 0,76 |
| ptg000088l | 1256748 | Not in assembly | 0 | 5990 | 0,78 |
| ptg000104l | 1238787 | Not in assembly | 0 | 5766 | 0,77 |
| ptg000056l | 1184652 | Not in assembly | 0 | 5407 | 0,75 |
| ptg000126l | 1156473 | Not in assembly | 0 | 5319 | 0,75 |
| ptg000090l | 1110547 | Not in assembly | 0 | 4950 | 0,73 |
| ptg000114l | 1084180 | Not in assembly | 0 | 4749 | 0,72 |
| ptg000044l | 1079234 | Not in assembly | 0 | 4939 | 0,75 |
| ptg000015l | 1074961 | Not in assembly | 0 | 4962 | 0,76 |
| ptg000018l | 1068149 | Not in assembly | 0 | 4757 | 0,73 |
| ptg000078l | 1036428 | Not in assembly | 0 | 4936 | 0,78 |
| ptg000158l | 1006862 | Not in assembly | 0 | 4577 | 0,75 |
| ptg000098l | 988208  | Not in assembly | 0 | 4693 | 0,78 |
| ptg000267l | 971371  | Not in assembly | 0 | 4469 | 0,76 |
| ptg000213l | 887666  | Not in assembly | 0 | 4327 | 0,80 |
| ptg000053l | 811358  | Not in assembly | 0 | 3485 | 0,70 |
| ptg000097l | 777334  | Not in assembly | 0 | 3335 | 0,70 |
| ptg000059l | 775387  | Not in assembly | 0 | 3659 | 0,77 |
| ptg000094l | 738787  | Not in assembly | 0 | 3468 | 0,77 |
| ptg000199l | 724576  | Not in assembly | 0 | 3404 | 0,77 |
| ptg000063l | 716369  | Not in assembly | 0 | 3493 | 0,80 |
| ptg000129l | 680079  | Not in assembly | 0 | 3117 | 0,75 |
| ptg000116l | 670382  | Not in assembly | 0 | 3106 | 0,76 |
| ptg000121l | 660441  | Not in assembly | 0 | 3068 | 0,76 |
| ptg000035l | 646817  | Not in assembly | 0 | 3019 | 0,77 |
| ptg000096l | 594209  | Not in assembly | 0 | 0    | 0,00 |
| ptg000152l | 590308  | Not in assembly | 0 | 2792 | 0,78 |
| ptg000028l | 580311  | Not in assembly | 0 | 2822 | 0,80 |
| ptg000093l | 568283  | Not in assembly | 0 | 2540 | 0,73 |
| ptg000043l | 561382  | Not in assembly | 0 | 2721 | 0,80 |
| ptg000038l | 546753  | Not in assembly | 0 | 2529 | 0,76 |
| ptg000186l | 537662  | Not in assembly | 0 | 0    | 0,00 |
| ptg000133l | 532681  | Not in assembly | 0 | 2625 | 0,81 |
| ptg000076l | 527702  | Not in assembly | 0 | 2402 | 0,75 |
| ptg000235l | 524959  | Not in assembly | 0 | 2441 | 0,76 |
| ptg000257l | 524603  | Not in assembly | 0 | 2498 | 0,78 |
| ptg000182l | 523867  | Not in assembly | 0 | 2446 | 0,76 |
| ptg000109l | 511458  | Not in assembly | 0 | 2387 | 0,77 |
| ptg000177l | 497895  | Not in assembly | 0 | 2436 | 0,81 |
| ptg000127l | 497554  | Not in assembly | 0 | 2248 | 0,74 |
| ptg000184l | 490759  | Not in assembly | 0 | 2340 | 0,78 |
| ptg000388l | 488132  | Not in assembly | 0 | 2213 | 0,74 |
| ptg000128l | 485598  | Not in assembly | 0 | 2264 | 0,77 |
| ptg000197l | 471589  | Not in assembly | 0 | 2417 | 0,84 |
| ptg000147l | 468996  | Not in assembly | 0 | 0    | 0,00 |
| ptg000229l | 468900  | Not in assembly | 0 | 2298 | 0,81 |

|            |        |                 |   |      |      |
|------------|--------|-----------------|---|------|------|
| ptg000115l | 466183 | Not in assembly | 0 | 0    | 0,00 |
| ptg000118l | 465240 | Not in assembly | 0 | 2116 | 0,75 |
| ptg000259l | 461691 | Not in assembly | 0 | 2204 | 0,78 |
| ptg000070l | 459566 | Not in assembly | 0 | 2240 | 0,80 |
| ptg000153l | 454565 | Not in assembly | 0 | 2039 | 0,74 |
| ptg000155l | 452951 | Not in assembly | 0 | 2127 | 0,77 |
| ptg000037l | 446734 | Not in assembly | 0 | 1960 | 0,72 |
| ptg000170l | 433386 | Not in assembly | 0 | 1941 | 0,74 |
| ptg000327l | 432635 | Not in assembly | 0 | 2252 | 0,86 |
| ptg000124l | 422641 | Not in assembly | 0 | 2040 | 0,79 |
| ptg000001l | 419306 | Not in assembly | 0 | 2068 | 0,81 |
| ptg000165l | 405545 | Not in assembly | 0 | 1787 | 0,72 |
| ptg000026l | 403608 | Not in assembly | 0 | 1954 | 0,79 |
| ptg000167l | 392659 | Not in assembly | 0 | 1896 | 0,79 |
| ptg000304l | 391381 | Not in assembly | 0 | 1860 | 0,78 |
| ptg000214l | 384589 | Not in assembly | 0 | 1733 | 0,74 |
| ptg000175l | 372308 | Not in assembly | 0 | 1808 | 0,80 |
| ptg000080l | 368092 | Not in assembly | 0 | 1784 | 0,79 |
| ptg000222l | 361668 | Not in assembly | 0 | 1621 | 0,73 |
| ptg000248l | 360381 | Not in assembly | 0 | 1742 | 0,79 |
| ptg000318l | 357318 | Not in assembly | 0 | 1710 | 0,79 |
| ptg000072l | 356993 | Not in assembly | 0 | 1683 | 0,77 |
| ptg000164l | 356501 | Not in assembly | 0 | 1752 | 0,81 |
| ptg000047l | 351567 | Not in assembly | 0 | 1620 | 0,76 |
| ptg000042l | 345137 | Not in assembly | 0 | 202  | 0,09 |
| ptg000296l | 343458 | Not in assembly | 0 | 1493 | 0,71 |
| ptg000185l | 339152 | Not in assembly | 0 | 1532 | 0,74 |
| ptg000203l | 328842 | Not in assembly | 0 | 1307 | 0,65 |
| ptg000281l | 326709 | Not in assembly | 4 | 29   | 0,02 |
| ptg000110l | 322964 | Not in assembly | 0 | 0    | 0,00 |
| ptg000356l | 322616 | Not in assembly | 0 | 1560 | 0,79 |
| ptg000145l | 320972 | Not in assembly | 0 | 1580 | 0,81 |
| ptg000183l | 314762 | Not in assembly | 0 | 1557 | 0,81 |
| ptg000250l | 307075 | Not in assembly | 0 | 1422 | 0,76 |
| ptg000275l | 305176 | Not in assembly | 0 | 1461 | 0,79 |
| ptg000218l | 297780 | Not in assembly | 0 | 44   | 0,04 |
| ptg000366l | 293149 | Not in assembly | 0 | 1433 | 0,80 |
| ptg000427l | 290808 | Not in assembly | 0 | 56   | 0,05 |
| ptg000349l | 290317 | Not in assembly | 0 | 1360 | 0,77 |
| ptg000270l | 285906 | Not in assembly | 0 | 1328 | 0,76 |
| ptg000160l | 279617 | Not in assembly | 0 | 1340 | 0,79 |
| ptg000343l | 276429 | Not in assembly | 0 | 0    | 0,00 |
| ptg000220l | 275893 | Not in assembly | 2 | 13   | 0,01 |
| ptg000163l | 271400 | Not in assembly | 0 | 1243 | 0,75 |
| ptg000188l | 267609 | Not in assembly | 0 | 169  | 0,09 |
| ptg000216l | 262024 | Not in assembly | 0 | 7    | 0,00 |
| ptg000362l | 260182 | Not in assembly | 0 | 1335 | 0,84 |
| ptg000017l | 253722 | Not in assembly | 0 | 1117 | 0,72 |
| ptg000134l | 252353 | Not in assembly | 0 | 1184 | 0,77 |

|            |        |                 |   |      |      |
|------------|--------|-----------------|---|------|------|
| ptg000283l | 250011 | Not in assembly | 0 | 1218 | 0,80 |
| ptg000174l | 245862 | Not in assembly | 0 | 1156 | 0,77 |
| ptg000233l | 243028 | Not in assembly | 0 | 1198 | 0,81 |
| ptg000065l | 242163 | Not in assembly | 0 | 0    | 0,00 |
| ptg000142l | 241074 | Not in assembly | 0 | 1084 | 0,74 |
| ptg000132l | 237971 | Not in assembly | 0 | 1107 | 0,76 |
| ptg000192c | 232129 | Not in assembly | 0 | 1094 | 0,77 |
| ptg000481l | 228167 | Not in assembly | 0 | 1134 | 0,81 |
| ptg000323l | 227978 | Not in assembly | 0 | 40   | 0,05 |
| ptg000272l | 227402 | Not in assembly | 0 | 0    | 0,00 |
| ptg000340l | 225249 | Not in assembly | 0 | 1103 | 0,80 |
| ptg000159l | 224176 | Not in assembly | 0 | 1018 | 0,74 |
| ptg000205l | 223432 | Not in assembly | 0 | 0    | 0,00 |
| ptg000300l | 221232 | Not in assembly | 0 | 991  | 0,74 |
| ptg000137l | 221142 | Not in assembly | 0 | 0    | 0,00 |
| ptg000241l | 220608 | Not in assembly | 0 | 0    | 0,00 |
| ptg000122l | 219331 | Not in assembly | 0 | 1183 | 0,89 |
| ptg000143l | 218579 | Not in assembly | 0 | 964  | 0,73 |
| ptg000161l | 217341 | Not in assembly | 0 | 0    | 0,00 |
| ptg000298l | 213190 | Not in assembly | 0 | 0    | 0,00 |
| ptg000154l | 213057 | Not in assembly | 0 | 908  | 0,70 |
| ptg000434l | 212017 | Not in assembly | 0 | 1038 | 0,81 |
| ptg000169l | 211889 | Not in assembly | 0 | 0    | 0,00 |
| ptg000289l | 211858 | Not in assembly | 0 | 1064 | 0,82 |
| ptg000135l | 211663 | Not in assembly | 0 | 877  | 0,68 |
| ptg000360l | 208658 | Not in assembly | 0 | 995  | 0,78 |
| ptg000171l | 208381 | Not in assembly | 0 | 0    | 0,00 |
| ptg000013l | 207939 | Not in assembly | 0 | 914  | 0,72 |
| ptg000254l | 207419 | Not in assembly | 0 | 1021 | 0,81 |
| ptg000240l | 205407 | Not in assembly | 0 | 938  | 0,75 |
| ptg000310l | 205373 | Not in assembly | 0 | 967  | 0,77 |
| ptg000234l | 204192 | Not in assembly | 0 | 979  | 0,79 |
| ptg000269l | 198998 | Not in assembly | 0 | 987  | 0,81 |
| ptg000256l | 191947 | Not in assembly | 0 | 0    | 0,00 |
| ptg000402l | 191944 | Not in assembly | 0 | 883  | 0,76 |
| ptg000119l | 191793 | Not in assembly | 0 | 874  | 0,75 |
| ptg000131l | 191266 | Not in assembly | 0 | 558  | 0,48 |
| ptg000333l | 190778 | Not in assembly | 0 | 934  | 0,81 |
| ptg000313l | 190689 | Not in assembly | 0 | 872  | 0,75 |
| ptg000459l | 189259 | Not in assembly | 7 | 847  | 0,74 |
| ptg000206l | 185278 | Not in assembly | 0 | 768  | 0,68 |
| ptg000189l | 184537 | Not in assembly | 0 | 857  | 0,76 |
| ptg000263l | 183806 | Not in assembly | 0 | 916  | 0,82 |
| ptg000201l | 182304 | Not in assembly | 0 | 837  | 0,75 |
| ptg000146l | 180670 | Not in assembly | 0 | 58   | 0,08 |
| ptg000271l | 178886 | Not in assembly | 0 | 923  | 0,85 |
| ptg000178l | 178183 | Not in assembly | 0 | 860  | 0,79 |
| ptg000348l | 177789 | Not in assembly | 0 | 898  | 0,83 |
| ptg000309l | 175500 | Not in assembly | 0 | 0    | 0,00 |

|            |        |                 |   |     |      |
|------------|--------|-----------------|---|-----|------|
| ptg000058l | 173077 | Not in assembly | 0 | 823 | 0,78 |
| ptg000355l | 172555 | Not in assembly | 0 | 756 | 0,72 |
| ptg000149l | 172174 | Not in assembly | 0 | 788 | 0,75 |
| ptg000210l | 170413 | Not in assembly | 0 | 781 | 0,76 |
| ptg000239l | 168659 | Not in assembly | 0 | 753 | 0,73 |
| ptg000496l | 161905 | Not in assembly | 9 | 4   | 0,00 |
| ptg000279l | 160641 | Not in assembly | 0 | 0   | 0,00 |
| ptg000335l | 160505 | Not in assembly | 0 | 750 | 0,77 |
| ptg000344l | 160111 | Not in assembly | 0 | 748 | 0,77 |
| ptg000141l | 158326 | Not in assembly | 0 | 0   | 0,00 |
| ptg000358c | 157558 | Not in assembly | 0 | 695 | 0,72 |
| ptg000421l | 157114 | Not in assembly | 0 | 734 | 0,77 |
| ptg000079l | 156019 | Not in assembly | 0 | 731 | 0,77 |
| ptg000338l | 155146 | Not in assembly | 0 | 754 | 0,80 |
| ptg000411l | 152887 | Not in assembly | 0 | 699 | 0,75 |
| ptg000223l | 150609 | Not in assembly | 0 | 706 | 0,77 |
| ptg000354l | 150091 | Not in assembly | 0 | 551 | 0,60 |
| ptg000462l | 149369 | Not in assembly | 0 | 720 | 0,79 |
| ptg000168l | 149014 | Not in assembly | 0 | 724 | 0,80 |
| ptg000373l | 147913 | Not in assembly | 0 | 680 | 0,75 |
| ptg000238l | 146699 | Not in assembly | 0 | 0   | 0,00 |
| ptg000260l | 142725 | Not in assembly | 0 | 0   | 0,00 |
| ptg000425l | 141017 | Not in assembly | 0 | 712 | 0,83 |
| ptg000398l | 140870 | Not in assembly | 0 | 598 | 0,70 |
| ptg000242l | 138364 | Not in assembly | 0 | 0   | 0,00 |
| ptg000383l | 138117 | Not in assembly | 0 | 633 | 0,75 |
| ptg000443l | 136355 | Not in assembly | 0 | 661 | 0,80 |
| ptg000274l | 135896 | Not in assembly | 0 | 0   | 0,00 |
| ptg000312l | 135004 | Not in assembly | 9 | 0   | 0,00 |
| ptg000027l | 132822 | Not in assembly | 0 | 0   | 0,00 |
| ptg000157l | 128812 | Not in assembly | 0 | 641 | 0,82 |
| ptg000286l | 127089 | Not in assembly | 0 | 651 | 0,84 |
| ptg000376l | 125399 | Not in assembly | 0 | 588 | 0,77 |
| ptg000217l | 124064 | Not in assembly | 0 | 549 | 0,73 |
| ptg000522l | 122862 | Not in assembly | 0 | 668 | 0,90 |
| ptg000487l | 121955 | Not in assembly | 0 | 490 | 0,66 |
| ptg000448l | 121877 | Not in assembly | 0 | 538 | 0,73 |
| ptg000401c | 121621 | Not in assembly | 0 | 0   | 0,00 |
| ptg000276l | 119532 | Not in assembly | 0 | 575 | 0,79 |
| ptg000485l | 118585 | Not in assembly | 0 | 0   | 0,00 |
| ptg000357l | 117353 | Not in assembly | 0 | 583 | 0,82 |
| ptg000467l | 116613 | Not in assembly | 0 | 0   | 0,00 |
| ptg000442l | 116125 | Not in assembly | 0 | 573 | 0,81 |
| ptg000295l | 110045 | Not in assembly | 0 | 0   | 0,00 |
| ptg000394l | 109933 | Not in assembly | 0 | 0   | 0,00 |
| ptg000207l | 108246 | Not in assembly | 0 | 461 | 0,70 |
| ptg000247l | 107652 | Not in assembly | 0 | 0   | 0,00 |
| ptg000314l | 106891 | Not in assembly | 0 | 524 | 0,81 |
| ptg000453l | 106698 | Not in assembly | 0 | 530 | 0,82 |

|            |        |                 |   |     |      |
|------------|--------|-----------------|---|-----|------|
| ptg000320l | 106372 | Not in assembly | 0 | 486 | 0,75 |
| ptg000345l | 105208 | Not in assembly | 0 | 475 | 0,74 |
| ptg000209l | 103893 | Not in assembly | 0 | 493 | 0,78 |
| ptg000445l | 103753 | Not in assembly | 0 | 395 | 0,62 |
| ptg000347l | 101855 | Not in assembly | 0 | 464 | 0,75 |
| ptg000375l | 101059 | Not in assembly | 0 | 497 | 0,81 |
| ptg000077l | 99753  | Not in assembly | 0 | 513 | 0,85 |
| ptg000191l | 98794  | Not in assembly | 0 | 0   | 0,00 |
| ptg000474l | 98337  | Not in assembly | 0 | 456 | 0,76 |
| ptg000307l | 98328  | Not in assembly | 0 | 438 | 0,73 |
| ptg000023c | 98234  | Not in assembly | 0 | 472 | 0,79 |
| ptg000524l | 97609  | Not in assembly | 0 | 437 | 0,74 |
| ptg000395l | 97396  | Not in assembly | 0 | 436 | 0,74 |
| ptg000439l | 97173  | Not in assembly | 0 | 475 | 0,80 |
| ptg000454l | 97135  | Not in assembly | 0 | 474 | 0,80 |
| ptg000482l | 96229  | Not in assembly | 0 | 454 | 0,77 |
| ptg000390l | 95794  | Not in assembly | 0 | 0   | 0,00 |
| ptg000324l | 95746  | Not in assembly | 0 | 408 | 0,70 |
| ptg000452l | 95568  | Not in assembly | 0 | 473 | 0,81 |
| ptg000190l | 95152  | Not in assembly | 0 | 432 | 0,75 |
| ptg000230l | 93748  | Not in assembly | 0 | 421 | 0,74 |
| ptg000423l | 93733  | Not in assembly | 0 | 490 | 0,86 |
| ptg000339l | 93168  | Not in assembly | 0 | 0   | 0,00 |
| ptg000156l | 92763  | Not in assembly | 0 | 472 | 0,84 |
| ptg000224l | 90971  | Not in assembly | 5 | 0   | 0,00 |
| ptg000123l | 90614  | Not in assembly | 0 | 462 | 0,84 |
| ptg000521l | 90603  | Not in assembly | 0 | 0   | 0,00 |
| ptg000393l | 90484  | Not in assembly | 0 | 485 | 0,88 |
| ptg000495l | 86894  | Not in assembly | 6 | 0   | 0,00 |
| ptg000221l | 86451  | Not in assembly | 0 | 0   | 0,00 |
| ptg000438l | 86296  | Not in assembly | 0 | 405 | 0,77 |
| ptg000470l | 85322  | Not in assembly | 0 | 394 | 0,76 |
| ptg000498l | 85171  | Not in assembly | 0 | 0   | 0,00 |
| ptg000308c | 84936  | Not in assembly | 3 | 0   | 0,00 |
| ptg000086l | 84061  | Not in assembly | 9 | 0   | 0,00 |
| ptg000363l | 83893  | Not in assembly | 0 | 0   | 0,00 |
| ptg000369l | 83782  | Not in assembly | 0 | 2   | 0,00 |
| ptg000195l | 82798  | Not in assembly | 0 | 0   | 0,00 |
| ptg000291l | 82682  | Not in assembly | 0 | 383 | 0,76 |
| ptg000258l | 82229  | Not in assembly | 0 | 366 | 0,73 |
| ptg000292l | 81820  | Not in assembly | 0 | 440 | 0,88 |
| ptg000172l | 80791  | Not in assembly | 0 | 0   | 0,00 |
| ptg000367l | 79041  | Not in assembly | 0 | 0   | 0,00 |
| ptg000315l | 78865  | Not in assembly | 0 | 372 | 0,78 |
| ptg000033l | 78764  | Not in assembly | 0 | 391 | 0,81 |
| ptg000208l | 78538  | Not in assembly | 0 | 131 | 0,28 |
| ptg000084l | 78477  | Not in assembly | 0 | 389 | 0,81 |
| ptg000365l | 78281  | Not in assembly | 0 | 380 | 0,80 |
| ptg000336l | 77612  | Not in assembly | 0 | 15  | 0,05 |



|            |       |                 |   |     |      |
|------------|-------|-----------------|---|-----|------|
| ptg000432l | 77484 | Not in assembly | 0 | 0   | 0,00 |
| ptg000288l | 77442 | Not in assembly | 0 | 376 | 0,80 |
| ptg000410l | 77175 | Not in assembly | 0 | 369 | 0,79 |
| ptg000403l | 76893 | Not in assembly | 0 | 390 | 0,84 |
| ptg000457l | 75778 | Not in assembly | 0 | 356 | 0,77 |
| ptg000029c | 75186 | Not in assembly | 0 | 319 | 0,69 |
| ptg000436l | 74685 | Not in assembly | 0 | 434 | 0,96 |
| ptg000541l | 74412 | Not in assembly | 0 | 372 | 0,82 |
| ptg000577l | 74221 | Not in assembly | 0 | 0   | 0,00 |
| ptg000261l | 73761 | Not in assembly | 0 | 345 | 0,77 |
| ptg000290l | 73433 | Not in assembly | 0 | 401 | 0,90 |
| ptg000280l | 73038 | Not in assembly | 0 | 0   | 0,00 |
| ptg000542l | 72534 | Not in assembly | 0 | 0   | 0,00 |
| ptg000514l | 72172 | Not in assembly | 0 | 0   | 0,00 |
| ptg000138l | 71282 | Not in assembly | 0 | 356 | 0,82 |
| ptg000553l | 69629 | Not in assembly | 0 | 363 | 0,86 |
| ptg000301l | 68243 | Not in assembly | 0 | 14  | 0,03 |
| ptg000284l | 66757 | Not in assembly | 4 | 0   | 0,00 |
| ptg000460l | 66293 | Not in assembly | 0 | 356 | 0,89 |
| ptg000506l | 65555 | Not in assembly | 0 | 288 | 0,72 |
| ptg000449l | 65100 | Not in assembly | 0 | 0   | 0,00 |
| ptg000469l | 64918 | Not in assembly | 0 | 0   | 0,00 |
| ptg000255l | 64144 | Not in assembly | 0 | 317 | 0,81 |
| ptg000287l | 63955 | Not in assembly | 0 | 299 | 0,77 |
| ptg000554l | 63891 | Not in assembly | 0 | 0   | 0,00 |
| ptg000277l | 62918 | Not in assembly | 0 | 0   | 0,00 |
| ptg000400l | 61929 | Not in assembly | 0 | 0   | 0,00 |
| ptg000501l | 61754 | Not in assembly | 0 | 296 | 0,79 |
| ptg000262l | 61128 | Not in assembly | 0 | 0   | 0,00 |
| ptg000430l | 60471 | Not in assembly | 0 | 295 | 0,80 |
| ptg000510l | 59750 | Not in assembly | 0 | 13  | 0,04 |
| ptg000520l | 58202 | Not in assembly | 0 | 278 | 0,78 |
| ptg000409l | 58034 | Not in assembly | 0 | 276 | 0,78 |
| ptg000294l | 56599 | Not in assembly | 0 | 295 | 0,86 |
| ptg000507l | 56120 | Not in assembly | 0 | 0   | 0,00 |
| ptg000471l | 55724 | Not in assembly | 0 | 279 | 0,82 |
| ptg000265l | 55645 | Not in assembly | 0 | 257 | 0,76 |
| ptg000227l | 54868 | Not in assembly | 0 | 294 | 0,88 |
| ptg000412l | 54803 | Not in assembly | 0 | 0   | 0,00 |
| ptg000297l | 54741 | Not in assembly | 0 | 239 | 0,72 |
| ptg000252l | 54463 | Not in assembly | 0 | 0   | 0,00 |
| ptg000446l | 54395 | Not in assembly | 0 | 271 | 0,82 |
| ptg000332c | 54370 | Not in assembly | 0 | 238 | 0,72 |
| ptg000575l | 54103 | Not in assembly | 0 | 0   | 0,00 |
| ptg000381l | 53698 | Not in assembly | 0 | 240 | 0,73 |
| ptg000226l | 53514 | Not in assembly | 0 | 250 | 0,77 |
| ptg000350l | 53500 | Not in assembly | 0 | 0   | 0,00 |
| ptg000479l | 53285 | Not in assembly | 0 | 0   | 0,00 |
| ptg000574l | 51856 | Not in assembly | 0 | 0   | 0,00 |

|            |       |                 |   |     |      |
|------------|-------|-----------------|---|-----|------|
| ptg000244l | 51653 | Not in assembly | 1 | 0   | 0,00 |
| ptg000490l | 51583 | Not in assembly | 0 | 0   | 0,00 |
| ptg000502l | 51554 | Not in assembly | 0 | 257 | 0,82 |
| ptg000447l | 51546 | Not in assembly | 0 | 0   | 0,00 |
| ptg000547l | 51515 | Not in assembly | 0 | 257 | 0,82 |
| ptg000125l | 51104 | Not in assembly | 0 | 224 | 0,72 |
| ptg000480l | 51084 | Not in assembly | 0 | 254 | 0,82 |
| ptg000465l | 51067 | Not in assembly | 0 | 249 | 0,80 |
| ptg000237l | 50582 | Not in assembly | 0 | 2   | 0,00 |
| ptg000584l | 50320 | Not in assembly | 0 | 230 | 0,75 |
| ptg000455l | 49964 | Not in assembly | 0 | 215 | 0,71 |
| ptg000407l | 49942 | Not in assembly | 0 | 230 | 0,75 |
| ptg000456l | 49654 | Not in assembly | 0 | 0   | 0,00 |
| ptg000537l | 49606 | Not in assembly | 0 | 218 | 0,72 |
| ptg000517l | 49315 | Not in assembly | 0 | 0   | 0,00 |
| ptg000316c | 49296 | Not in assembly | 0 | 239 | 0,79 |
| ptg000546l | 48915 | Not in assembly | 0 | 248 | 0,83 |
| ptg000334l | 48798 | Not in assembly | 0 | 2   | 0,00 |
| ptg000387l | 48511 | Not in assembly | 0 | 0   | 0,00 |
| ptg000180l | 48142 | Not in assembly | 0 | 0   | 0,00 |
| ptg000540l | 47457 | Not in assembly | 0 | 0   | 0,00 |
| ptg000346l | 46837 | Not in assembly | 0 | 0   | 0,00 |
| ptg000370l | 46824 | Not in assembly | 0 | 0   | 0,00 |
| ptg000382l | 46792 | Not in assembly | 0 | 0   | 0,00 |
| ptg000468l | 46499 | Not in assembly | 0 | 0   | 0,00 |
| ptg000561l | 46001 | Not in assembly | 0 | 225 | 0,80 |
| ptg000322l | 45640 | Not in assembly | 0 | 213 | 0,77 |
| ptg000557l | 45610 | Not in assembly | 0 | 0   | 0,00 |
| ptg000441l | 45202 | Not in assembly | 0 | 0   | 0,00 |
| ptg000477l | 45105 | Not in assembly | 0 | 0   | 0,00 |
| ptg000509l | 45099 | Not in assembly | 0 | 221 | 0,80 |
| ptg000573l | 44879 | Not in assembly | 0 | 0   | 0,00 |
| ptg000617l | 44855 | Not in assembly | 0 | 0   | 0,00 |
| ptg000535l | 44853 | Not in assembly | 0 | 0   | 0,00 |
| ptg000505l | 44691 | Not in assembly | 0 | 212 | 0,78 |
| ptg000572l | 44208 | Not in assembly | 0 | 0   | 0,00 |
| ptg000473l | 43957 | Not in assembly | 0 | 87  | 0,18 |
| ptg000475l | 43104 | Not in assembly | 0 | 218 | 0,83 |
| ptg000598l | 43083 | Not in assembly | 0 | 0   | 0,00 |
| ptg000549l | 42854 | Not in assembly | 0 | 0   | 0,00 |
| ptg000466l | 42712 | Not in assembly | 0 | 228 | 0,87 |
| ptg000580l | 42683 | Not in assembly | 0 | 0   | 0,00 |
| ptg000497l | 42542 | Not in assembly | 0 | 0   | 0,00 |
| ptg000523l | 42442 | Not in assembly | 0 | 0   | 0,00 |
| ptg000337l | 42084 | Not in assembly | 0 | 223 | 0,87 |
| ptg000560l | 41711 | Not in assembly | 0 | 0   | 0,00 |
| ptg000579l | 41161 | Not in assembly | 0 | 0   | 0,00 |
| ptg000278l | 41142 | Not in assembly | 0 | 0   | 0,00 |
| ptg000567l | 41115 | Not in assembly | 5 | 0   | 0,00 |

|            |       |                 |   |     |      |
|------------|-------|-----------------|---|-----|------|
| ptg000534l | 40278 | Not in assembly | 0 | 0   | 0,00 |
| ptg000504l | 40157 | Not in assembly | 0 | 222 | 0,91 |
| ptg000305l | 40016 | Not in assembly | 0 | 0   | 0,00 |
| ptg000499l | 39616 | Not in assembly | 0 | 115 | 0,48 |
| ptg000636l | 39472 | Not in assembly | 0 | 194 | 0,81 |
| ptg000491l | 39002 | Not in assembly | 0 | 152 | 0,64 |
| ptg000351l | 38737 | Not in assembly | 0 | 0   | 0,00 |
| ptg000645l | 38673 | Not in assembly | 0 | 174 | 0,74 |
| ptg000625l | 38610 | Not in assembly | 0 | 0   | 0,00 |
| ptg000559l | 38301 | Not in assembly | 0 | 209 | 0,90 |
| ptg000091l | 38279 | Not in assembly | 0 | 0   | 0,00 |
| ptg000605l | 38122 | Not in assembly | 0 | 0   | 0,00 |
| ptg000268l | 37776 | Not in assembly | 0 | 0   | 0,00 |
| ptg000608l | 37727 | Not in assembly | 0 | 0   | 0,00 |
| ptg000528l | 37426 | Not in assembly | 0 | 17  | 0,07 |
| ptg000476l | 37388 | Not in assembly | 0 | 194 | 0,86 |
| ptg000231l | 37275 | Not in assembly | 0 | 149 | 0,66 |
| ptg000655l | 36968 | Not in assembly | 0 | 191 | 0,85 |
| ptg000431l | 36943 | Not in assembly | 0 | 156 | 0,69 |
| ptg000385l | 36876 | Not in assembly | 0 | 155 | 0,69 |
| ptg000519l | 36826 | Not in assembly | 0 | 0   | 0,00 |
| ptg000415l | 36291 | Not in assembly | 0 | 14  | 0,06 |
| ptg000451l | 36163 | Not in assembly | 0 | 0   | 0,00 |
| ptg000458l | 36153 | Not in assembly | 8 | 0   | 0,00 |
| ptg000582l | 36028 | Not in assembly | 0 | 0   | 0,00 |
| ptg000428l | 35983 | Not in assembly | 0 | 202 | 0,92 |
| ptg000647l | 35697 | Not in assembly | 0 | 157 | 0,72 |
| ptg000440l | 35684 | Not in assembly | 0 | 0   | 0,00 |
| ptg000653l | 34479 | Not in assembly | 0 | 174 | 0,83 |
| ptg000187l | 34389 | Not in assembly | 0 | 0   | 0,00 |
| ptg000527l | 34202 | Not in assembly | 0 | 155 | 0,74 |
| ptg000600l | 34114 | Not in assembly | 0 | 0   | 0,00 |
| ptg000526l | 34096 | Not in assembly | 0 | 0   | 0,00 |
| ptg000613l | 34054 | Not in assembly | 0 | 0   | 0,00 |
| ptg000610l | 33963 | Not in assembly | 0 | 8   | 0,04 |
| ptg000585l | 33875 | Not in assembly | 0 | 0   | 0,00 |
| ptg000299l | 33810 | Not in assembly | 0 | 0   | 0,00 |
| ptg000377l | 33046 | Not in assembly | 0 | 0   | 0,00 |
| ptg000488l | 32894 | Not in assembly | 0 | 168 | 0,84 |
| ptg000634l | 32427 | Not in assembly | 0 | 173 | 0,88 |
| ptg000629l | 32380 | Not in assembly | 0 | 0   | 0,00 |
| ptg000592l | 32277 | Not in assembly | 0 | 0   | 0,00 |
| ptg000273l | 32116 | Not in assembly | 0 | 0   | 0,00 |
| ptg000631l | 31998 | Not in assembly | 0 | 180 | 0,93 |
| ptg000662l | 31977 | Not in assembly | 0 | 161 | 0,83 |
| ptg000539l | 31950 | Not in assembly | 0 | 0   | 0,00 |
| ptg000609l | 31908 | Not in assembly | 0 | 0   | 0,00 |
| ptg000364l | 31907 | Not in assembly | 0 | 156 | 0,80 |
| ptg000544l | 31900 | Not in assembly | 0 | 156 | 0,81 |

|            |       |                 |   |     |      |
|------------|-------|-----------------|---|-----|------|
| ptg000538l | 31799 | Not in assembly | 0 | 0   | 0,00 |
| ptg000472l | 31581 | Not in assembly | 0 | 0   | 0,00 |
| ptg000391l | 31530 | Not in assembly | 0 | 259 | 0,90 |
| ptg000511l | 31440 | Not in assembly | 0 | 17  | 0,06 |
| ptg000464l | 31437 | Not in assembly | 0 | 0   | 0,01 |
| ptg000493l | 30965 | Not in assembly | 0 | 151 | 0,80 |
| ptg000552l | 30817 | Not in assembly | 0 | 0   | 0,00 |
| ptg000374l | 30743 | Not in assembly | 0 | 0   | 0,00 |
| ptg000418l | 30673 | Not in assembly | 0 | 272 | 0,97 |
| ptg000590l | 30601 | Not in assembly | 0 | 0   | 0,00 |
| ptg000204l | 30515 | Not in assembly | 0 | 0   | 0,00 |
| ptg000543l | 30463 | Not in assembly | 0 | 0   | 0,00 |
| ptg000379l | 30443 | Not in assembly | 0 | 142 | 0,76 |
| ptg000181l | 30254 | Not in assembly | 0 | 0   | 0,00 |
| ptg000325l | 30253 | Not in assembly | 0 | 0   | 0,00 |
| ptg000532l | 30210 | Not in assembly | 0 | 0   | 0,00 |
| ptg000569l | 30191 | Not in assembly | 0 | 180 | 0,98 |
| ptg000489l | 30169 | Not in assembly | 0 | 0   | 0,00 |
| ptg000551l | 30018 | Not in assembly | 0 | 118 | 0,64 |
| ptg000422l | 29963 | Not in assembly | 0 | 139 | 0,76 |
| ptg000565l | 29881 | Not in assembly | 0 | 0   | 0,00 |
| ptg000583l | 29819 | Not in assembly | 1 | 0   | 0,00 |
| ptg000414l | 29793 | Not in assembly | 0 | 144 | 0,80 |
| ptg000417l | 29564 | Not in assembly | 0 | 0   | 0,00 |
| ptg000494l | 29286 | Not in assembly | 0 | 111 | 0,62 |
| ptg000550l | 29141 | Not in assembly | 0 | 124 | 0,70 |
| ptg000587l | 29114 | Not in assembly | 0 | 0   | 0,00 |
| ptg000371l | 29067 | Not in assembly | 0 | 0   | 0,00 |
| ptg000484l | 28479 | Not in assembly | 0 | 0   | 0,00 |
| ptg000642l | 28325 | Not in assembly | 0 | 109 | 0,63 |
| ptg000659l | 28296 | Not in assembly | 0 | 141 | 0,82 |
| ptg000558l | 28220 | Not in assembly | 0 | 140 | 0,82 |
| ptg000562l | 28209 | Not in assembly | 0 | 137 | 0,80 |
| ptg000435l | 27827 | Not in assembly | 0 | 0   | 0,00 |
| ptg000616l | 27804 | Not in assembly | 0 | 136 | 0,80 |
| ptg000619l | 27738 | Not in assembly | 0 | 0   | 0,00 |
| ptg000632l | 27594 | Not in assembly | 0 | 120 | 0,72 |
| ptg000628l | 27427 | Not in assembly | 0 | 124 | 0,74 |
| ptg000618l | 27329 | Not in assembly | 5 | 0   | 0,00 |
| ptg000512l | 27253 | Not in assembly | 0 | 0   | 0,00 |
| ptg000566l | 27036 | Not in assembly | 0 | 0   | 0,00 |
| ptg000594l | 27021 | Not in assembly | 0 | 2   | 0,01 |
| ptg000623l | 27004 | Not in assembly | 0 | 114 | 0,69 |
| ptg000219l | 26982 | Not in assembly | 0 | 0   | 0,00 |
| ptg000660l | 26732 | Not in assembly | 0 | 128 | 0,79 |
| ptg000530l | 26567 | Not in assembly | 0 | 158 | 0,98 |
| ptg000386l | 26555 | Not in assembly | 0 | 0   | 0,00 |
| ptg000486l | 26421 | Not in assembly | 0 | 0   | 0,00 |
| ptg000361l | 26404 | Not in assembly | 0 | 0   | 0,00 |

|            |       |                 |   |     |      |
|------------|-------|-----------------|---|-----|------|
| ptg000601l | 26382 | Not in assembly | 0 | 0   | 0,00 |
| ptg000555l | 26367 | Not in assembly | 0 | 0   | 0,00 |
| ptg000586l | 26251 | Not in assembly | 0 | 0   | 0,00 |
| ptg000578l | 25909 | Not in assembly | 7 | 0   | 0,00 |
| ptg000646l | 25811 | Not in assembly | 0 | 0   | 0,00 |
| ptg000666l | 25645 | Not in assembly | 0 | 125 | 0,80 |
| ptg000513c | 25638 | Not in assembly | 0 | 123 | 0,78 |
| ptg000508c | 25472 | Not in assembly | 0 | 11  | 0,11 |
| ptg000651l | 25447 | Not in assembly | 0 | 134 | 0,87 |
| ptg000603l | 25426 | Not in assembly | 0 | 0   | 0,00 |
| ptg000656l | 25413 | Not in assembly | 0 | 121 | 0,78 |
| ptg000529l | 25314 | Not in assembly | 0 | 0   | 0,00 |
| ptg000536l | 25262 | Not in assembly | 0 | 0   | 0,00 |
| ptg000589l | 25225 | Not in assembly | 0 | 0   | 0,00 |
| ptg000581l | 25190 | Not in assembly | 0 | 0   | 0,00 |
| ptg000612l | 25172 | Not in assembly | 0 | 0   | 0,00 |
| ptg000380l | 25146 | Not in assembly | 0 | 213 | 0,93 |
| ptg000643l | 25104 | Not in assembly | 0 | 121 | 0,79 |
| ptg000515l | 25099 | Not in assembly | 1 | 0   | 0,00 |
| ptg000622l | 25019 | Not in assembly | 0 | 11  | 0,11 |
| ptg000670l | 24950 | Not in assembly | 0 | 129 | 0,85 |
| ptg000317l | 24949 | Not in assembly | 0 | 120 | 0,79 |
| ptg000602l | 24796 | Not in assembly | 0 | 121 | 0,80 |
| ptg000649l | 24746 | Not in assembly | 0 | 0   | 0,00 |
| ptg000285l | 24627 | Not in assembly | 0 | 121 | 0,81 |
| ptg000593l | 24600 | Not in assembly | 0 | 198 | 0,87 |
| ptg000516l | 24530 | Not in assembly | 0 | 0   | 0,00 |
| ptg000433l | 24205 | Not in assembly | 0 | 122 | 0,83 |
| ptg000212l | 24143 | Not in assembly | 0 | 0   | 0,00 |
| ptg000675l | 24031 | Not in assembly | 0 | 114 | 0,77 |
| ptg000563l | 24029 | Not in assembly | 0 | 0   | 0,00 |
| ptg000637l | 23963 | Not in assembly | 0 | 125 | 0,86 |
| ptg000633l | 23869 | Not in assembly | 0 | 0   | 0,00 |
| ptg000548l | 23863 | Not in assembly | 0 | 118 | 0,81 |
| ptg000639l | 23729 | Not in assembly | 0 | 10  | 0,11 |
| ptg000352l | 23670 | Not in assembly | 0 | 0   | 0,00 |
| ptg000416l | 23665 | Not in assembly | 5 | 49  | 0,34 |
| ptg000568l | 23664 | Not in assembly | 0 | 0   | 0,00 |
| ptg000596l | 23650 | Not in assembly | 0 | 116 | 0,81 |
| ptg000483l | 23601 | Not in assembly | 0 | 0   | 0,00 |
| ptg000678l | 23361 | Not in assembly | 0 | 0   | 0,00 |
| ptg000638l | 23346 | Not in assembly | 0 | 138 | 0,98 |
| ptg000139l | 23312 | Not in assembly | 1 | 0   | 0,00 |
| ptg000626l | 23215 | Not in assembly | 0 | 125 | 0,88 |
| ptg000408l | 22976 | Not in assembly | 0 | 0   | 0,00 |
| ptg000611l | 22835 | Not in assembly | 0 | 0   | 0,00 |
| ptg000478l | 22673 | Not in assembly | 0 | 2   | 0,01 |
| ptg000564l | 22638 | Not in assembly | 0 | 0   | 0,00 |
| ptg000635l | 22441 | Not in assembly | 0 | 132 | 0,97 |

|            |       |                 |   |     |      |
|------------|-------|-----------------|---|-----|------|
| ptg000595l | 22388 | Not in assembly | 0 | 108 | 0,80 |
| ptg000571l | 22376 | Not in assembly | 0 | 0   | 0,00 |
| ptg000492l | 22206 | Not in assembly | 0 | 0   | 0,00 |
| ptg000641l | 22171 | Not in assembly | 0 | 0   | 0,00 |
| ptg000545l | 21984 | Not in assembly | 0 | 0   | 0,00 |
| ptg000661l | 21935 | Not in assembly | 0 | 0   | 0,00 |
| ptg000640l | 21829 | Not in assembly | 0 | 130 | 0,98 |
| ptg000450l | 21594 | Not in assembly | 0 | 94  | 0,72 |
| ptg000392l | 21394 | Not in assembly | 0 | 95  | 0,73 |
| ptg000677l | 21250 | Not in assembly | 0 | 115 | 0,89 |
| ptg000615l | 21188 | Not in assembly | 0 | 0   | 0,00 |
| ptg000597l | 21120 | Not in assembly | 0 | 0   | 0,00 |
| ptg000679l | 21110 | Not in assembly | 0 | 126 | 0,98 |
| ptg000665l | 21091 | Not in assembly | 0 | 0   | 0,00 |
| ptg000652l | 21023 | Not in assembly | 0 | 0   | 0,00 |
| ptg000518l | 20930 | Not in assembly | 0 | 0   | 0,00 |
| ptg000657l | 20744 | Not in assembly | 0 | 0   | 0,00 |
| ptg000667l | 20713 | Not in assembly | 0 | 105 | 0,84 |
| ptg000676l | 20675 | Not in assembly | 0 | 95  | 0,75 |
| ptg000624l | 20408 | Not in assembly | 0 | 113 | 0,91 |
| ptg000669l | 20359 | Not in assembly | 0 | 0   | 0,00 |
| ptg000630l | 20262 | Not in assembly | 0 | 121 | 0,99 |
| ptg000658l | 20165 | Not in assembly | 0 | 104 | 0,85 |
| ptg000673l | 20038 | Not in assembly | 0 | 0   | 0,00 |
| ptg000654l | 19944 | Not in assembly | 0 | 0   | 0,00 |
| ptg000331l | 19751 | Not in assembly | 0 | 116 | 0,64 |
| ptg000668l | 19683 | Not in assembly | 0 | 116 | 0,97 |
| ptg000674l | 19320 | Not in assembly | 0 | 80  | 0,68 |
| ptg000648l | 19168 | Not in assembly | 0 | 115 | 0,99 |
| ptg000664l | 19040 | Not in assembly | 0 | 103 | 0,89 |
| ptg000650l | 18771 | Not in assembly | 0 | 81  | 0,71 |
| ptg000663l | 18708 | Not in assembly | 0 | 106 | 0,93 |
| ptg000591l | 18499 | Not in assembly | 0 | 0   | 0,00 |
| ptg000405l | 18467 | Not in assembly | 0 | 0   | 0,00 |
| ptg000533l | 18170 | Not in assembly | 0 | 0   | 0,00 |
| ptg000588l | 18159 | Not in assembly | 0 | 0   | 0,00 |
| ptg000576l | 18107 | Not in assembly | 0 | 0   | 0,00 |
| ptg000404l | 17950 | Not in assembly | 0 | 68  | 0,62 |
| ptg000672l | 17714 | Not in assembly | 0 | 85  | 0,79 |
| ptg000620l | 17658 | Not in assembly | 0 | 0   | 0,01 |
| ptg000606l | 16957 | Not in assembly | 0 | 0   | 0,00 |
| ptg000607l | 16841 | Not in assembly | 0 | 0   | 0,00 |
| ptg000627l | 16775 | Not in assembly | 0 | 82  | 0,80 |
| ptg000671l | 16368 | Not in assembly | 0 | 95  | 0,96 |
| ptg000644l | 14979 | Not in assembly | 0 | 0   | 0,00 |
| ptg000604l | 14717 | Not in assembly | 0 | 0   | 0,00 |
| ptg000621l | 14065 | Not in assembly | 0 | 0   | 0,00 |
| ptg000599l | 13227 | Not in assembly | 0 | 2   | 0,02 |
