# Supplementary material for: Reference-Guided De Novo Genome Assembly of the Flour Beetle Tribolium freemani
Source: MDPI journal article supplement (doi:10.3390/ijms23115869), 2022-05-24
Supplement: s1 [file s1]

**Table S7.** Abundance and characteristics of organizational properties of the major satellite DNA TFREE in the *T. freemani* genome assembly Tfree1.0 and in the hifiasm contigs.

| <b>TFREE satellite DNA</b>                                     |                 |                        |
|----------------------------------------------------------------|-----------------|------------------------|
|                                                                | <b>Tfree1.0</b> | <b>Hifiasm contigs</b> |
| Number of monomers                                             | 216,594         | 1,003,839              |
| Total length (bp)                                              | 35,954,604      | 166,637,274            |
| Abundance (%)                                                  | 13.36           | 35.77                  |
| <b>Array (&gt;800 bp or 5 consecutive monomers) statistics</b> |                 |                        |
| Total number of arrays                                         | 2,766           |                        |
| Min. length (bp)                                               | 812             |                        |
| Q1 (bp)                                                        | 5,833           |                        |
| Median length (bp)                                             | 10,286          |                        |
| Q3 (bp)                                                        | 16,923          |                        |
| Max. length (bp)                                               | 93,724          |                        |
| Mean length (bp)                                               | 13,076          |                        |
