# Supplementary material for: Reference-Guided De Novo Genome Assembly of the Flour Beetle Tribolium freemani
Source: MDPI journal article supplement (doi:10.3390/ijms23115869), 2022-05-24
Supplement: s1 [file s1]

**Table S3.** Orientation scores obtained by RagTag algorithm used for optimal positioning of 99 contigs that were placed into ten *T. freemani* linkage groups.

| Query      | Grouping confidence | Location confidence | Orientation confidence |
|------------|---------------------|---------------------|------------------------|
| ptg000095l | 0,282362872         | 0,003131799         | 0,661787445            |
| ptg000396l | 1                   | 1                   | 1                      |
| ptg000061l | 0,748019496         | 0,345728428         | 0,449208572            |
| ptg000312l | 0,585727069         | 1                   | 1                      |
| ptg000069l | 0,723874362         | 0,55532304          | 0,243468999            |
| ptg000102l | 0,414721037         | 0,201463235         | 0,736722249            |
| ptg000082l | 0,712977558         | 0,373185265         | 0,829946981            |
| ptg000010l | 0,722713119         | 0,397163278         | 0,820206699            |
| ptg000531l | 1                   | 1                   | 1                      |
| ptg000148l | 0,998838354         | 0,951774536         | 0,995757831            |
| ptg000368l | 1                   | 0,9570073           | 0,98293186             |
| ptg000330l | 0,986167369         | 1                   | 1                      |
| ptg000419l | 0,99860062          | 0,943270051         | 0,972889024            |
| ptg000461l | 1                   | 0,982042959         | 1                      |
| ptg000503l | 1                   | 0,985786958         | 0,989826461            |
| ptg000117l | 0,977406168         | 0,185363949         | 0,999170153            |
| ptg000329l | 1                   | 0,008132964         | 1                      |
| ptg000003l | 0,984879426         | 0,940130016         | 0,755115327            |
| ptg000444l | 0,998919819         | 0,978162186         | 0,977257879            |
| ptg000567l | 1                   | 1                   | 1                      |
| ptg000081l | 0,956242944         | 0,336864242         | 0,987869528            |
| ptg000112l | 0,729717703         | 0,940047908         | 0,995152362            |
| ptg000282l | 0,734238289         | 0,001982547         | 0,513485681            |
| ptg000021l | 0,916067206         | 0,115443094         | 0,160772172            |
| ptg000326l | 1                   | 1                   | 1                      |
| ptg000420l | 1                   | 1                   | 1                      |
| ptg000525l | 1                   | 1                   | 1                      |
| ptg000041l | 0,922855357         | 0,288146229         | 0,818979465            |
| ptg000019l | 0,969990345         | 0,148107559         | 0,808289872            |
| ptg000426l | 1                   | 1                   | 1                      |
| ptg000264l | 0,929385448         | 0,012157895         | 0,94121666             |
| ptg000284l | 0,935817394         | 1                   | 1                      |
| ptg000458l | 1                   | 1                   | 1                      |
| ptg000406l | 1                   | 1                   | 1                      |
| ptg000046l | 0,935163498         | 0,038421865         | 0,965670813            |
| ptg000321l | 0,998962875         | 1                   | 1                      |
| ptg000384l | 0,606120222         | 0,07976616          | 1                      |
| ptg000228l | 0,985282263         | 0,013775343         | 0,8943217              |
| ptg000006l | 0,951934424         | 0,188504737         | 0,315147034            |
| ptg000045l | 0,338299399         | 0,00023801          | 0,517046968            |
| ptg000083l | 0,982631229         | 0,149056691         | 0,921074341            |
| ptg000251l | 0,982860139         | 0,051680649         | 0,900402357            |
| ptg000039l | 0,859728185         | 0,127162311         | 0,959260302            |
| ptg000144l | 0,945222044         | 0,033862795         | 0,382240711            |
| ptg000150l | 0,79303814          | 0,025433549         | 0,715867987            |
| ptg000105l | 0,897879341         | 0,351663524         | 0,441262073            |
| ptg000437l | 0,775430104         | 0,008586812         | 0,617681795            |
| ptg000232l | 0,977236585         | 0,294405636         | 0,756493708            |

|            |             |             |             |
|------------|-------------|-------------|-------------|
| ptg000570l | 0,961231367 | 1           | 1           |
| ptg000225l | 1           | 0,988107995 | 0,992456959 |
| ptg000057l | 1           | 1           | 1           |
| ptg000012l | 0,951832745 | 0,915297376 | 0,874675916 |
| ptg000500l | 1           | 1           | 1           |
| ptg000306l | 0,99955176  | 0,979082701 | 1           |
| ptg000162l | 0,995357952 | 0,976040904 | 1           |
| ptg000341l | 0,999433238 | 0,915409621 | 0,96480777  |
| ptg000302l | 1           | 1           | 1           |
| ptg000293l | 1           | 1           | 1           |
| ptg000328l | 1           | 1           | 1           |
| ptg000397l | 0,999681823 | 1           | 1           |
| ptg000016l | 0,91065262  | 0,87368693  | 0,956626509 |
| ptg000111l | 0,977765752 | 0,987779906 | 1           |
| ptg000429l | 1           | 1           | 1           |
| ptg000413l | 1           | 1           | 1           |
| ptg000266l | 1           | 1           | 1           |
| ptg000215l | 0,993707057 | 0,560686821 | 0,807959941 |
| ptg000036l | 0,911162587 | 0,205219886 | 0,856608446 |
| ptg000020l | 0,530657909 | 0,064258341 | 0,805332178 |
| ptg000048l | 0,824121171 | 0,594120022 | 0,559635672 |
| ptg000103l | 0,374219575 | 0,008528544 | 0,904668811 |
| ptg000496l | 0,876184803 | 0,785480932 | 1           |
| ptg000245l | 0,72212775  | 0,233015536 | 0,926815807 |
| ptg000319l | 0,94672919  | 0,191919025 | 0,915585637 |
| ptg000353l | 1           | 0,922991185 | 1           |
| ptg000173l | 0,999581681 | 0,99956081  | 0,999155809 |
| ptg000060l | 0,942658347 | 0,421208425 | 0,715848464 |
| ptg000071l | 0,925205246 | 0,355543082 | 0,14976901  |
| ptg000107l | 0,349987922 | 0,012723359 | 0,947852721 |
| ptg000194l | 0,537048595 | 0,134455885 | 0,917195544 |
| ptg000030l | 0,532948461 | 1           | 1           |
| ptg000052l | 0,329336245 | 0,00743164  | 0,573421654 |
| ptg000073l | 0,81767427  | 0,152326048 | 0,615989833 |
| ptg000022l | 0,879849841 | 0,133114747 | 0,789978285 |
| ptg000614l | 0,985196052 | 1           | 1           |
| ptg000311l | 0,453172966 | 0,019302102 | 0,950826715 |
| ptg000303l | 0,612073553 | 0,016294219 | 0,980494912 |
| ptg000463l | 1           | 0,932071975 | 0,941969237 |
| ptg000008l | 0,965965491 | 0,662803894 | 0,610037257 |
| ptg000359l | 0,511287289 | 0,955300603 | 0,986417635 |
| ptg000399l | 0,984634528 | 0,033305431 | 0,870252777 |
| ptg000253l | 0,947074838 | 0,467621773 | 0,8115905   |
| ptg000200l | 0,993168195 | 0,023736582 | 0,499682348 |
| ptg000166l | 0,645336404 | 0,094120637 | 0,696647924 |
| ptg000556l | 1           | 1           | 1           |
| ptg000004l | 0,828767724 | 0,152176001 | 0,555214214 |
| ptg000002l | 0,969771287 | 0,656696728 | 0,663338592 |
| ptg000031l | 0,831225966 | 0,306078389 | 0,629765486 |
| ptg000005l | 0,973226347 | 0,546662368 | 0,42995444  |
| ptg000202l | 0,930355862 | 1           | 1           |
