# Supplementary material for: Reference-Guided De Novo Genome Assembly of the Flour Beetle Tribolium freemani
Source: MDPI journal article supplement (doi:10.3390/ijms23115869), 2022-05-24
Supplement: s1 [file s1]

**Table S4.** Chromosome sizes in the *T. freemani* Tfree1.0 assembly (fLGs) compared to the chromosome sizes in the *T. castaneum* Tcas5.2 assembly (LGs). Chromosome sizes are calculated without ambiguous bases (N) and expressed in Mb.

| <i>T. freemani</i><br>Tfree1.0<br>chromosomes | fLG size<br>(Mb) | <i>T. castaneum</i><br>Tcas5.2<br>chromosomes | LG size<br>(Mb) | fLG vs. LG<br>size difference<br>(Mb) |
|-----------------------------------------------|------------------|-----------------------------------------------|-----------------|---------------------------------------|
| <b>fLG2</b>                                   | 32.31            | <b>LG2</b>                                    | 14.56           | 17.75                                 |
| <b>fLG3</b>                                   | 42.26            | <b>LG3</b>                                    | 29.60           | 12.66                                 |
| <b>fLG4</b>                                   | 16.96            | <b>LG4</b>                                    | 11.63           | 5.33                                  |
| <b>fLG5</b>                                   | 24.98            | <b>LG5</b>                                    | 14.34           | 10.64                                 |
| <b>fLG6</b>                                   | 23.21            | <b>LG6</b>                                    | 7.98            | 15.23                                 |
| <b>fLG7</b>                                   | 38.63            | <b>LG7</b>                                    | 15.19           | 23.44                                 |
| <b>fLG8</b>                                   | 23.81            | <b>LG8</b>                                    | 13.62           | 10.19                                 |
| <b>fLG9</b>                                   | 32.41            | <b>LG9</b>                                    | 15.01           | 17.41                                 |
| <b>fLG10</b>                                  | 15.39            | <b>LG10</b>                                   | 6.78            | 8.61                                  |
| <b>fLGX</b>                                   | 12.03            | <b>LGX</b>                                    | 7.43            | 4.60                                  |
| <b>Total</b>                                  | 262.00           | <b>Total</b>                                  | 136.14          | 125.86                                |
